# Supplementary material for: Endogenous aldehyde-induced DNA–protein crosslinks are resolved by transcription-coupled repair
Source: PubMed Central journal article supplement (PMC11098742; doi:10.1038/s41556-024-01401-2), 2024-04-10

# Extended Data Fig. 4 uncropped images

**a**

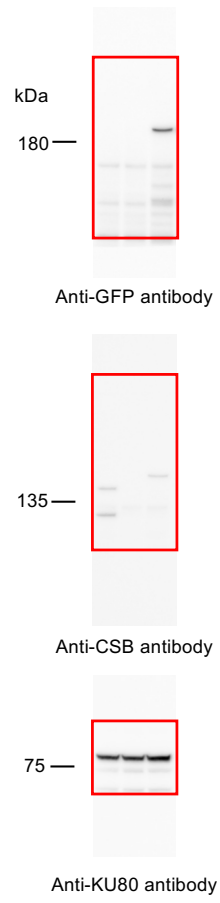

Supplement: 41556_2024_1401_MOESM8_ESM.pdf [file 41556_2024_1401_MOESM8_ESM.pdf]
