# Supplementary material for: Endogenous aldehyde-induced DNA–protein crosslinks are resolved by transcription-coupled repair
Source: PubMed Central journal article supplement (PMC11098742; doi:10.1038/s41556-024-01401-2), 2024-04-10
Supplement: 41556_2024_1401_MOESM9_ESM.pdf [file 41556_2024_1401_MOESM9_ESM.pdf]

**a**

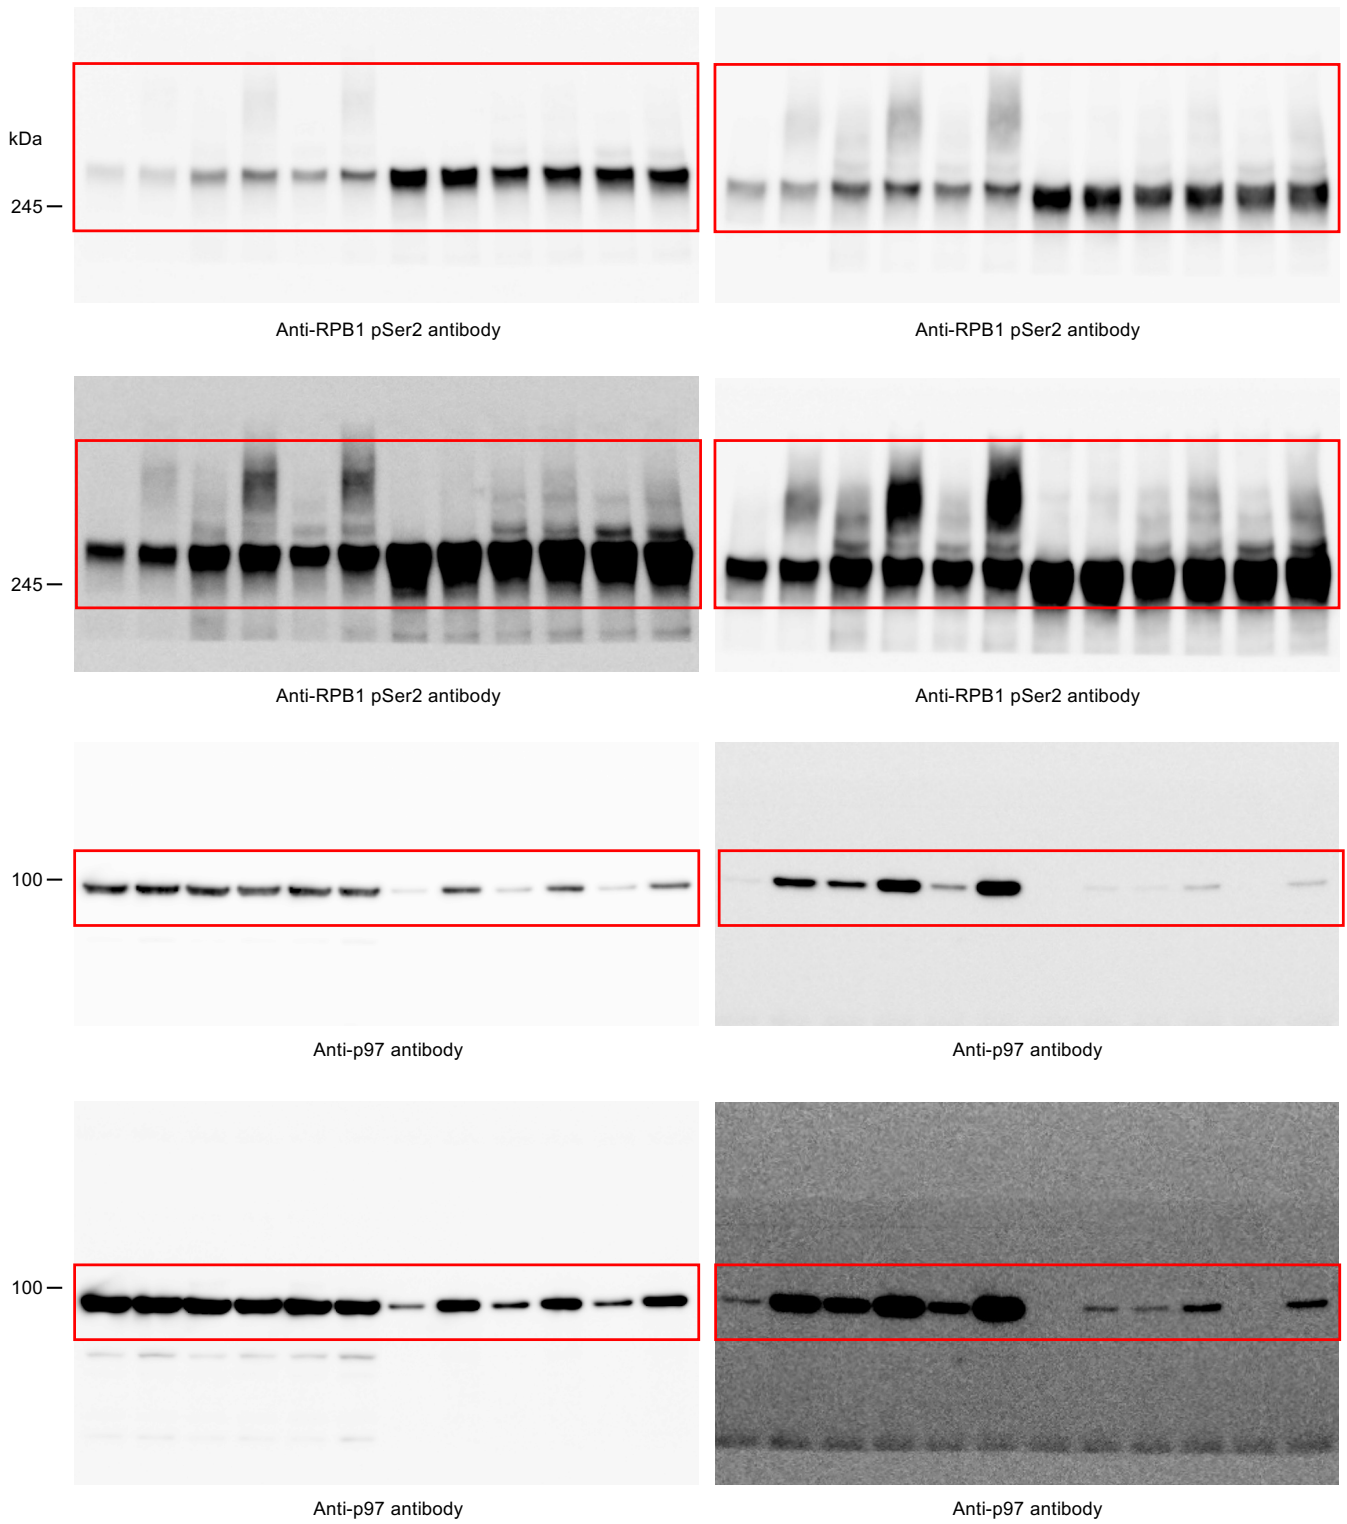

**b**

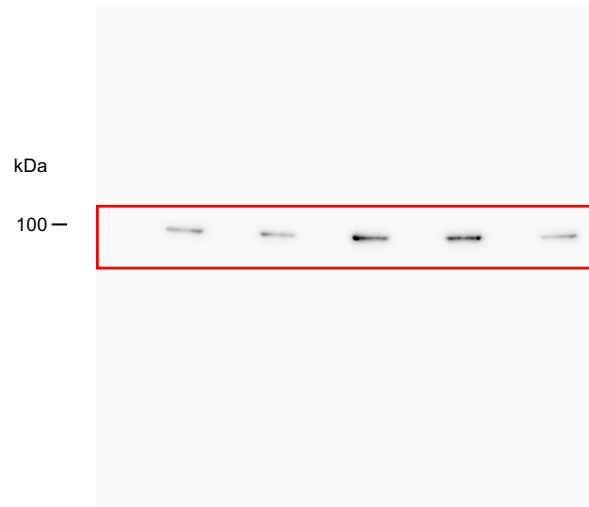

Anti-p97 antibody

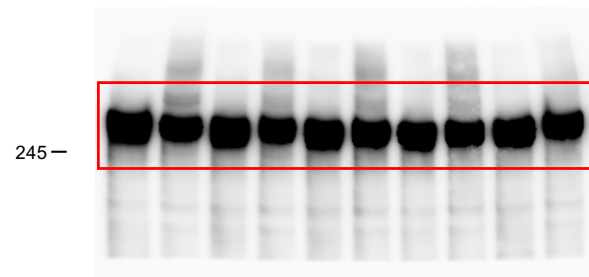

Anti-RPB1 pSer2 antibody

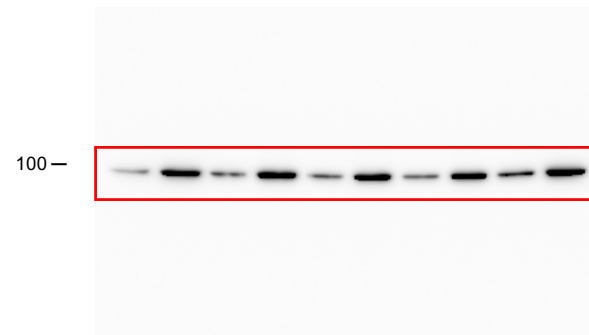

Anti-p97 antibody

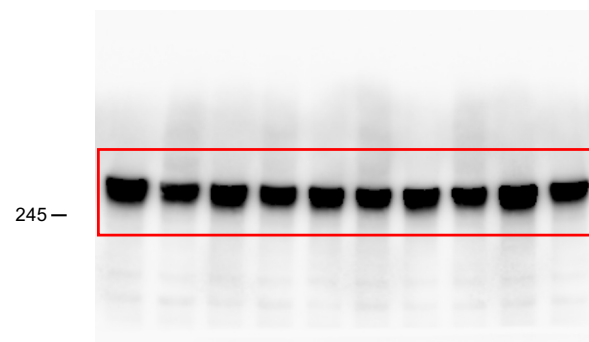

Anti-RPB1 pSer2 antibody
